# Supplementary material for: An affibody-adalimumab hybrid blocks combined IL-6 and TNF-triggered serum amyloid A secretion in vivo
Source: PubMed Central journal article supplement (PMC4622551; doi:10.4161/mabs.36089), 2014-11-01
Supplement: kmab-06-06-972803-s001.pdf [file kmab-06-06-972803-s001.pdf]

1  
2  
3  
4  
5  
6  
7  
8  
9  
10  
11  
12  
13  
14  
15  
16  
17  
18  
19  
20  
21  
22  
23  
24  
25  
26

**SUPPLEMENTARY MATERIAL**

to

**An Affibody-adalimumab Hybrid Blocks  
Combined IL-6 and TNF-triggered Serum  
Amyloid A Secretion *In Vivo***

by

Feifan Yu *et al.*

## Supplementary material

1  
2  
3  
4

|                                                                                                                                      | Page |
|--------------------------------------------------------------------------------------------------------------------------------------|------|
| S1 Selection conditions.                                                                                                             | 3    |
| S2 Initial <i>in vivo</i> study of the $Z_{IL-6_{13}}$ affibody in an acute SAA model.                                               | 4    |
| S3 Construction and production of AffiMabs.                                                                                          | 6    |
| S4 Determination of affinities for two AffiMabs, $Z_{IL-6_{13}}$ or adalimumab to IL-6 and TNF.                                      | 9    |
| S5 Comparison of the TNF blocking capabilities of $Z_{IL-6_{13}}-HC_{Ada}$ and $Z_{IL-6_{13}}-LC_{Ada}$ at a high TNF concentration. | 10   |

5

6

1 **S1: Selection conditions**

2

3 The IL-6 binding affibody proteins were selected from a combinatorial library displayed on  
4 bacteriophage (phagemids). During the selection campaign that was performed for four cycles,  
5 biotinylated human IL-6 target protein (in one track also murine IL-6 was used for one cycle<sup>(b)</sup>) was  
6 used in decreasing concentrations, and the number of washes after capture of phagemid-target  
7 complexes on streptavidin beads were successively increased during the selection process. Selection  
8 parameters used are summarized in the Table S1 below.

9

10 **Table S1. Selection conditions.**

|              | <b>Track 1</b>                                       | <b>Track 2</b>                                       | <b>Track 3</b>                                       |
|--------------|------------------------------------------------------|------------------------------------------------------|------------------------------------------------------|
| <b>Cycle</b> | <b>Target concentration (nM) /<br/>No. of washes</b> | <b>Target concentration (nM)<br/>/ No. of washes</b> | <b>Target concentration (nM)<br/>/ No. of washes</b> |
| 1            | 100/2                                                | 100/2                                                | 100/2                                                |
| 2            | 50/5                                                 | 10/5                                                 | 100 <sup>(b)</sup> /4                                |
| 3            | 25/6                                                 | 2/8                                                  | 25                                                   |
| 4            | 10/12                                                | 0.5/15                                               | 0.5                                                  |

11

## 1 **S2: Initial *in vivo* study of the $Z_{IL-6_{13}}$ affibody in an acute SAA model**

2

3 An initial study of the anti-arthritis efficacy of the  $Z_{IL-6_{13}}$  variant was performed *in vivo* using a mouse  
4 model for IL-6 triggered Serum Amyloid A (SAA) protein release. Five groups of Balb/c mice (n=7)  
5 were given either none, 0.025, 2.5 or 25 mg/kg body weight of an  $Z_{IL-6_{13}}$ -ABD fusion protein or 25  
6 mg/kg of a control affibody-ABD fusion protein ( $Z_{Taq}$ -ABD) subcutaneously nine hours before an  
7 injection of 5  $\mu$ g/kg body weight of hIL-6. After an additional 22 hours the levels of SAA protein were  
8 measured by ELISA (Tridelta) according to the manufacturer's instructions and compared between the  
9 different groups. In brief, diluted serum samples were added to SAA-precoated plates together with  
10 anti-SAA-HRP. The plates were incubated for 1 hour and then washed four times. TMB substrate was  
11 added for 20 min and the reaction was stopped with 2 M  $H_2SO_4$ . The absorbance was measured at 450  
12 nm using a microplate reader (Victor3, Perkin Elmer). In animals receiving either nothing of the  $Z_{IL-}$   
13  $6_{13}$ -ABD fusion or 25 mg/kg of the control affibody-ABD fusion, SAA protein levels increased to  
14 levels of approximately 500-600  $\mu$ g/ml blood compared to controls given only PBS instead of hIL-6  
15 where levels were below 40  $\mu$ g/ml. In animals given  $Z_{IL-6_{13}}$ -ABD fusion protein, a clear effect was  
16 seen as significantly lower SAA protein levels were measured in a dose-dependent manner (Fig. S2).  
17 For the group given the highest dose of  $Z_{IL-6_{13}}$ -ABD fusion (25 mg/kg body weight), SAA protein  
18 levels were as low as for animals given no hIL-6 injection. A control group receiving the highest  $Z_{IL-}$   
19  $6_{13}$ -ABD fusion (25 mg/kg body weight), but no IL-6, did not show any detectable SAA.

20

21

22

1  
2  
3

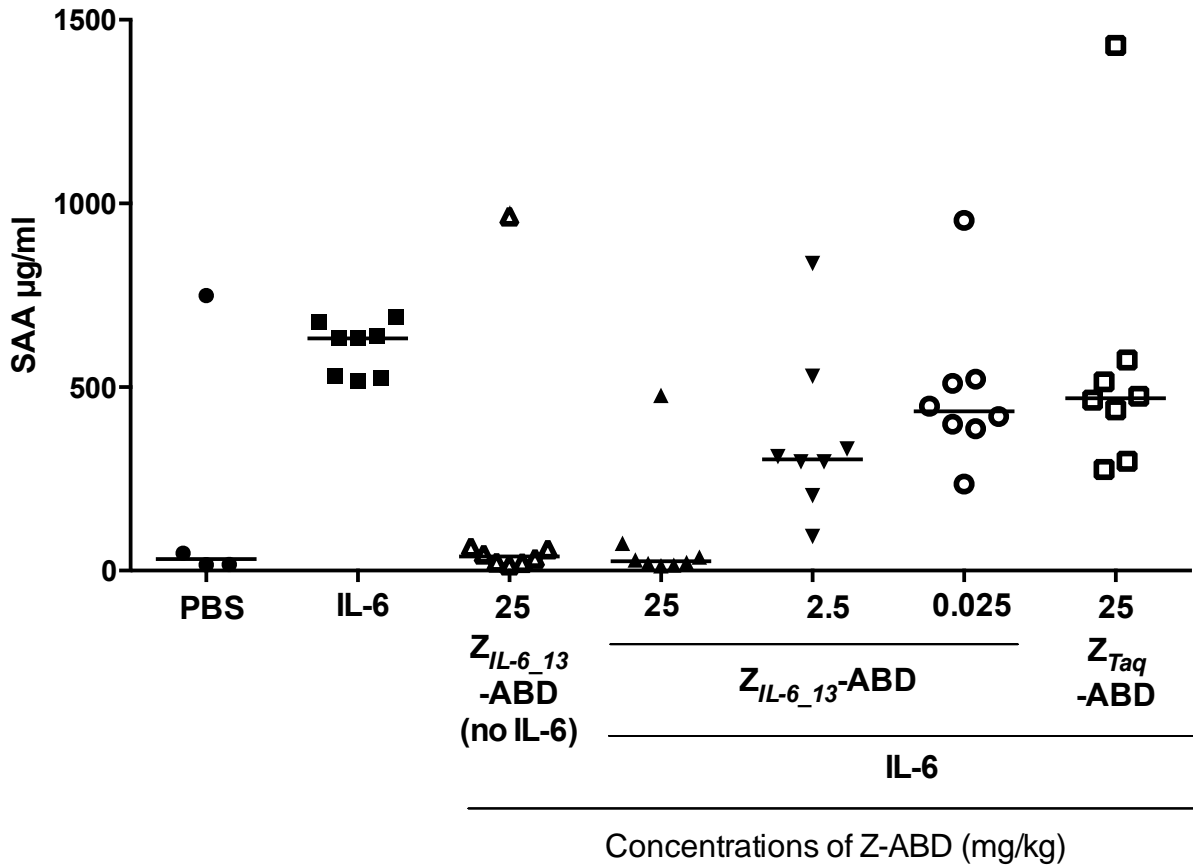

4

5 **Figure S2. Results from an acute SAA model study in mice for the  $Z_{IL-6_{13}}$ -ABD fusion**  
6 **protein.** Five groups of Balb/c mice (n=7) were given either 25, 2.5, 0.025 or none mg/kg  
7 body weight of an  $Z_{IL-6_{13}}$ -ABD fusion protein or 25 mg/kg of a control  $Z_{Taq}$ -ABD fusion  
8 protein subcutaneously nine hours before an injection of 5 µg/kg body weight of hIL-6. After  
9 an additional 22 hours the levels of SAA protein were measured by ELISA.

10  
11  
12  
13  
14  
15

### 1 **S3: Construction and production of AffiMabs**

2

3 Four different  $Z_{IL-6_{13}}$ -adalimumab fusions ("AffiMabs") were designed and produced. The anti-IL-6  
4  $Z_{IL-6_{13}}$  affibody molecule (AF) moiety was genetically fused, via flexible  $(GGGGS)_3$  linkers, to both  
5 the N-termina of the heavy (HC) and light (LC) chains of adalimumab, resulting in the constructs  
6  $Z_{IL-6_{13}}-HC_{Ada}$  and  $Z_{IL-6_{13}}-LC_{Ada}$ , respectively, and to the C-termina of the same chains, resulting in  
7 the constructs  $HC_{Ada}-Z_{IL-6_{13}}$  and  $LC_{Ada}-Z_{IL-6_{13}}$ , respectively (Fig. S3A). Production was performed  
8 in CHO cells using standard procedures and the AffiMabs purified from the culture supernatants via  
9 Protein A-affinity chromatography. The quality and purity of the AffiMabs was analyzed by SDS-  
10 PAGE under both non-reduced and reduced conditions (Fig. S3B).

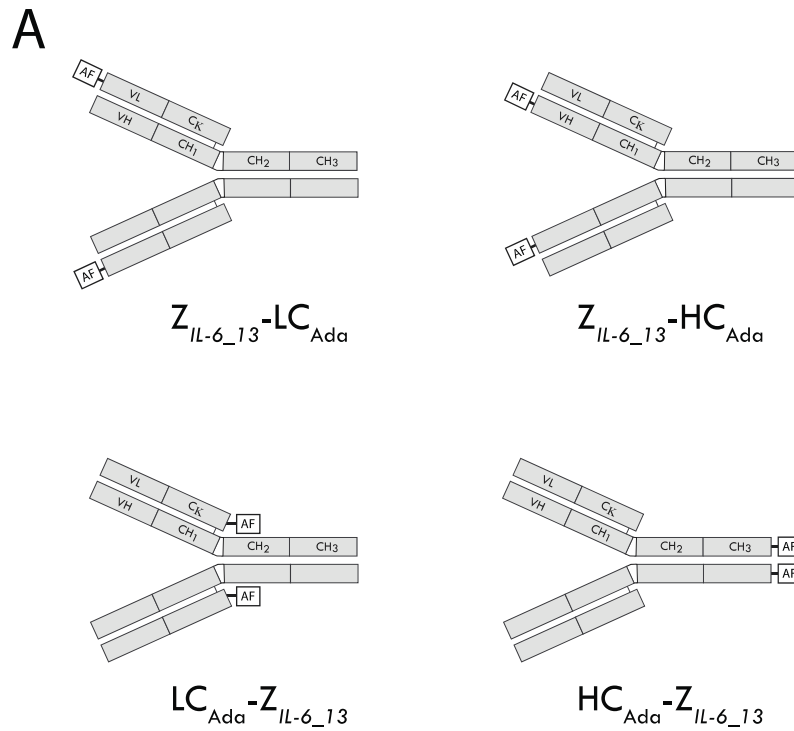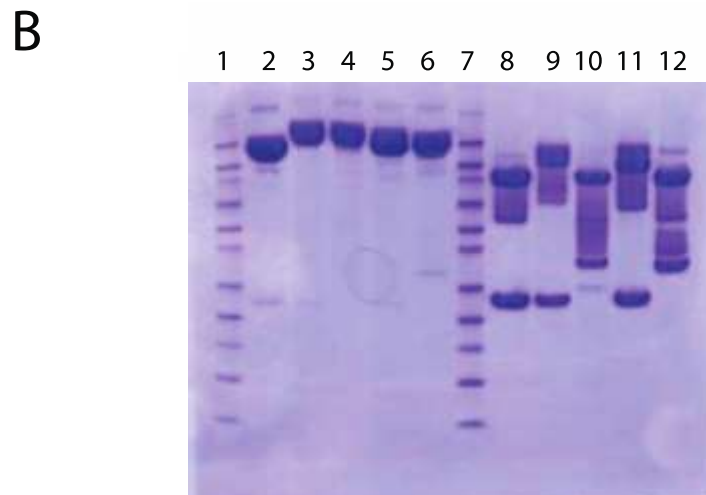

1  
2  
3 **Figure S3. Design and characterization of the four Affimabs.** (A): Schematic drawing  
4 of the design of the four AffiMab constructs. The designation "AF" depicts the anti-IL-6  
5 affibody variant  $Z_{IL-6\_13}$  sequence. The  $Z_{IL-6\_13}$  affibody sequence was in all constructs  
6 genetically linked to anti-TNF mAb adalimumab heavy ( $HC_{Ada}$ ) or light chains ( $LC_{Ada}$ )  
7 sequences via a 15 residue (GGGGS)<sub>3</sub>-linker, positioned either C-terminally (in constructs  
8  $Z_{IL-6\_13}$ - $LC_{Ada}$  and  $Z_{IL-6\_13}$ - $HC_{Ada}$ ) or N-terminally (in constructs  $LC_{Ada}$ - $Z_{IL-6\_13}$  and  $HC_{Ada}$ -

1  $Z_{IL-6_{13}}$ ) of the affibody  $Z_{IL-6_{13}}$  sequence. (B): SDS-PAGE analysis (12% polyacrylamide  
2 gel) of CHO cell produced and protein A affinity purified adalimumab and AffiMab  
3 constructs: Lane 1: Marker proteins; lane 2: adalimumab (non-reduced); lane 3: AffiMab  
4  $Z_{IL-6_{13}}-HC_{Ada}$  (non-reduced); lane 4: AffiMab  $Z_{IL-6_{13}}-LC_{Ada}$  (non-reduced); lane 5:  
5 AffiMab  $HC_{Ada}-Z_{IL-6_{13}}$  (non-reduced); lane 6: Affimab  $LC_{Ada}-Z_{IL-6_{13}}$  (non-reduced); lane  
6 7: Marker proteins; lane 8: adalimumab (reduced); lane 9: AffiMab  $Z_{IL-6_{13}}-HC_{Ada}$   
7 (reduced); lane 10: AffiMab  $Z_{IL-6_{13}}-LC_{Ada}$  (reduced); lane 11: AffiMab  $HC_{Ada}-Z_{IL-6_{13}}$   
8 (reduced) and lane 12: AffiMab  $LC_{Ada}-Z_{IL-6_{13}}$  (reduced).  
9



1 **S4: Determination of affinities for two AffiMabs,  $Z_{IL-6\_13}$  or adalimumab to IL-6**  
 2 **and TNF.**

3  
 4 The affinities for IL-6 and TNF were determined using proteins and conditions as described in the  
 5 main text (see Materials and Methods section). In the Table S4 below are summarized the measured  
 6 association rate constants, dissociation rate constants and calculated dissociation constants  
 7 interactions between the indicated constructs and IL-6 and TNF, respectively.

8  
 9  
 10 **Table S4. Summary of affinity determinations.** Summary of measured association rate  
 11 constants, dissociation rate constants and calculated dissociation constants interactions between  
 12 the indicated constructs and IL-6 and TNF, respectively.

| <b>IL-6</b>                        |                             |                                |                                 |
|------------------------------------|-----------------------------|--------------------------------|---------------------------------|
|                                    | $k_a$ ( $M^{-1} s^{-1}$ )   | $k_d$ ( $s^{-1}$ )             | $K_D$ (M)                       |
| $Z_{IL-6\_13}$ -HC <sub>Ada</sub>  | $3.16 \pm 0.02 \times 10^5$ | $2.28 \pm 0.30 \times 10^{-4}$ | $7.19 \pm 0.80 \times 10^{-10}$ |
| LC <sub>Ada</sub> - $Z_{IL-6\_13}$ | $1.40 \pm 0.03 \times 10^5$ | $1.30 \pm 0.20 \times 10^{-4}$ | $9.25 \pm 1.20 \times 10^{-10}$ |
| His <sub>6</sub> - $Z_{IL-6\_13}$  | $3.07 \pm 0.05 \times 10^5$ | $1.53 \pm 0.10 \times 10^{-4}$ | $4.97 \pm 0.30 \times 10^{-10}$ |
| <b>TNF</b>                         |                             |                                |                                 |
|                                    | $k_a$ ( $M^{-1} s^{-1}$ )   | $k_d$ ( $s^{-1}$ )             | $K_D$ (M)                       |
| $Z_{IL-6\_13}$ -HC <sub>Ada</sub>  | $6.21 \pm 0.04 \times 10^5$ | $1.05 \pm 0.00 \times 10^{-4}$ | $1.70 \pm 0.02 \times 10^{-10}$ |
| LC <sub>Ada</sub> - $Z_{IL-6\_13}$ | $8.42 \pm 0.05 \times 10^5$ | $1.10 \pm 0.02 \times 10^{-4}$ | $1.31 \pm 0.03 \times 10^{-10}$ |
| adalimumab                         | $7.41 \pm 0.06 \times 10^5$ | $1.60 \pm 0.10 \times 10^{-4}$ | $2.16 \pm 0.01 \times 10^{-10}$ |

13  
 14

1 **S5: Comparison of the TNF blocking capabilities of  $Z_{IL-6\_13}\text{-HC}_{Ada}$  and  $Z_{IL-6\_13}\text{-LC}_{Ada}$**   
2 **at a high TNF concentration.**

3

4 The two AffiMab constructs  $Z_{hIL-6\_13}\text{-HC}_{Ada}$  and  $Z_{hIL-6\_13}\text{-LC}_{Ada}$  were compared to adalimumab in a  
5 TF-1 cell assay for their capacities to block the effect of the relatively high TNF concentration of  
6 71.5 pM. Cells were cultured in RPMI1640 with L-glut (Lonza) supplemented with 10% FCS  
7 (Gibco), Pen-Strep (Lonza) and 2 ng/ml rhGM-CSF (RnD Systems). Prior to analysis, cells were  
8 washed twice in RPMI1640 in the absence of rhGM-CSF. Cells were dispensed into 96 well flat  
9 bottomed plates at a density of  $4 \times 10^4$ /cells per well. In separate plates serial dilutions of the  
10 AffiMab molecules or adalimumab were incubated in the presence of a fixed concentration of TNF  
11 1.2 ng/ml (0.072 nM). The pre-mixed samples of AffiMab molecules or adalimumab and TNF were  
12 then transferred to wells containing TF-1 cells. The plates were incubated for 72 hours at 37°C in a  
13 humidified 5% CO<sub>2</sub> atmosphere. During the last four hours of incubation 10 µl of CCK-8 (Fluka,  
14 Sigma Aldrich) was added per well to determine the number of proliferating cells. The absorbance  
15 was measured at 450 nm using a microplate reader. The experiment showed that both AffiMabs were  
16 capable of effective blocking of the growth stimulating TNF signal, but that the  $Z_{IL-6\_13}\text{-HC}_{Ada}$   
17 construct was more efficient than the  $Z_{IL-6\_13}\text{-LC}_{Ada}$  construct with an effect in parity with  
18 adalimumab included as reference (Fig. S5).

1

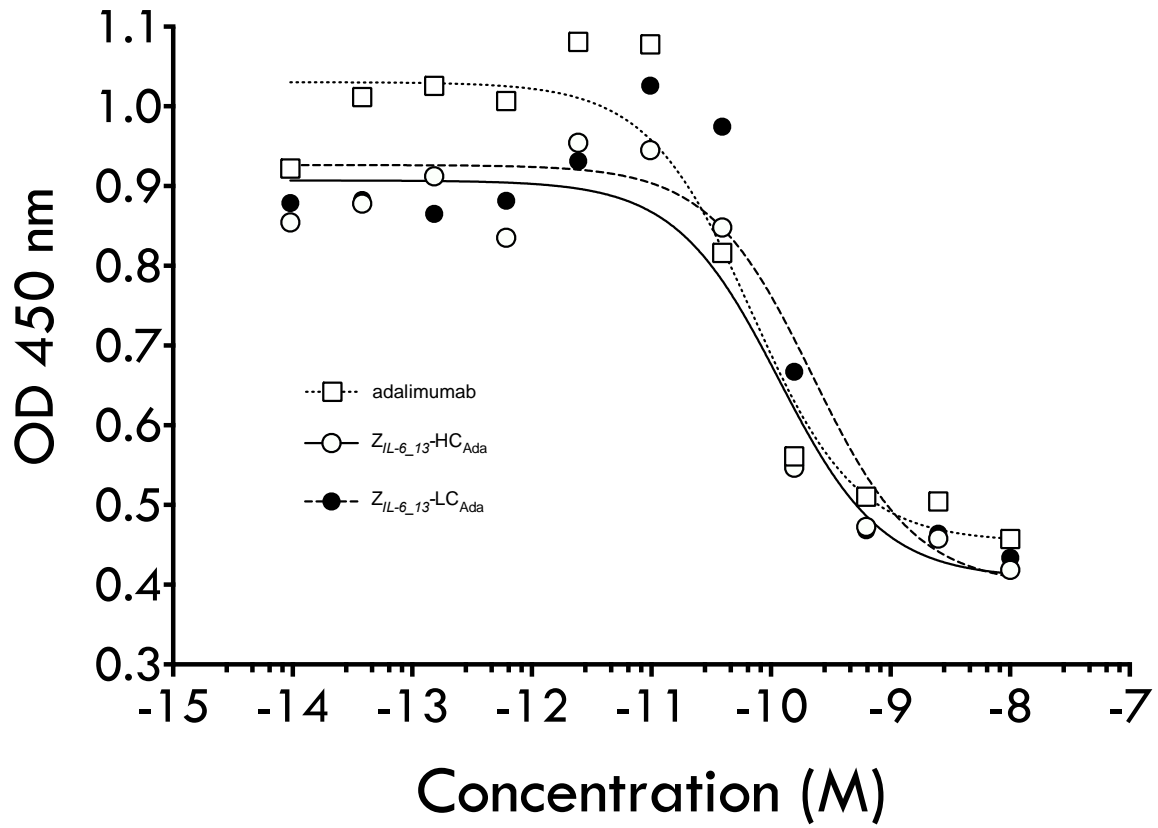

2

3

4 **Figure S5. Comparison of ZIL-6\_13-HC<sub>Ada</sub>, ZIL-6\_13-LC<sub>Ada</sub> AffiMabs and adalimumab**  
5 **for blocking of a high TNF concentration.** Results from an analysis of the capability of  
6 ZIL-6\_13-HC<sub>Ada</sub>, ZIL-6\_13-LC<sub>Ada</sub> AffiMabs or adalimumab to inhibit the growth of TNF  
7 stimulated TF-1 cells. The TNF concentration was 71.5 pM.

8
